# Supplementary material
Source: PubMed Central journal article supplement (PMC3009916)
Supplement: supp_M110.166439_jbc.M110.166439-1.pdf [file supp_M110.166439_jbc.M110.166439-1.pdf]

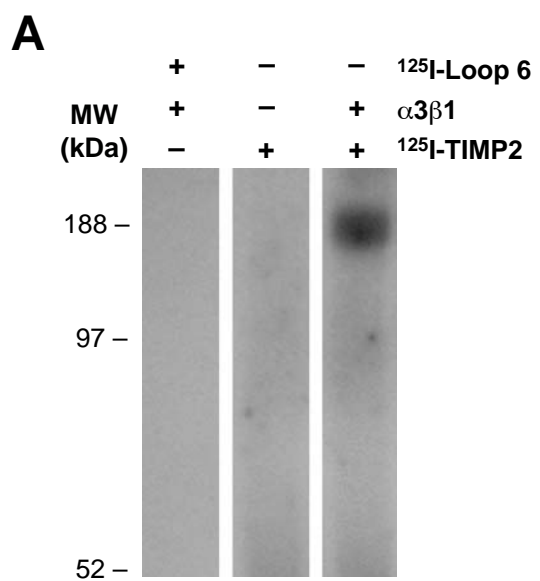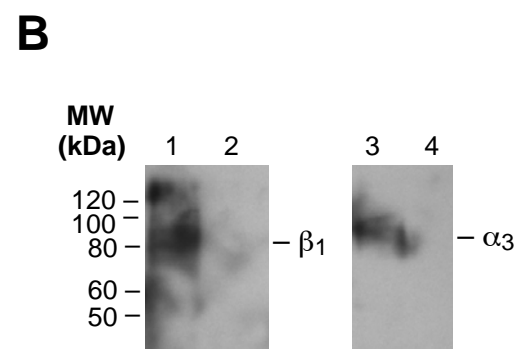

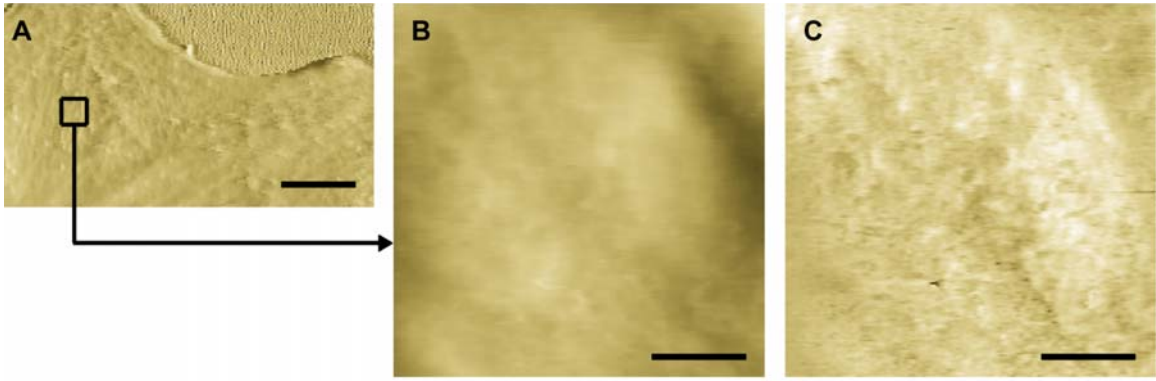

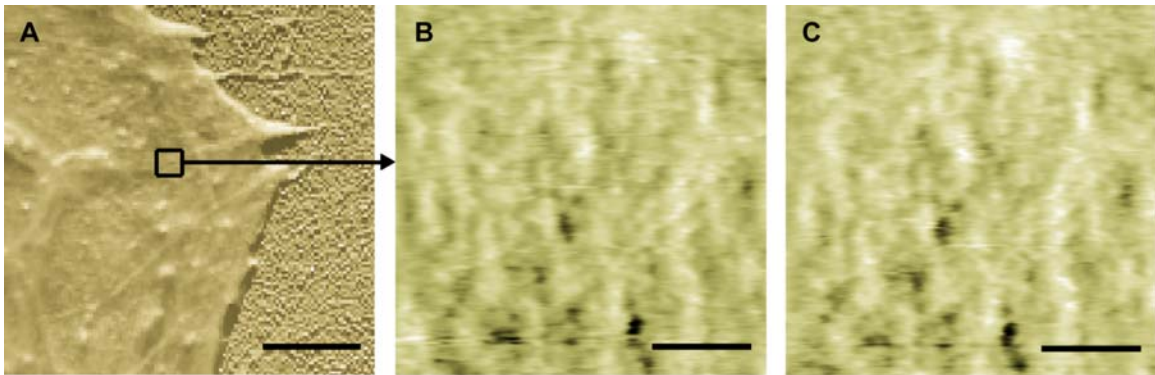

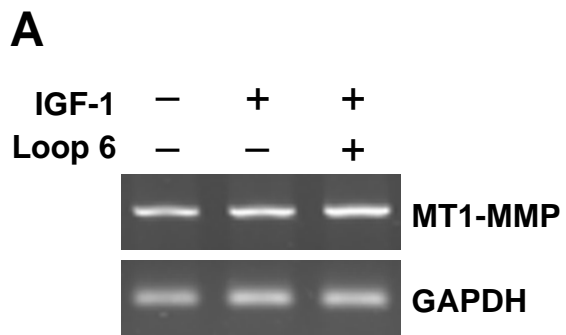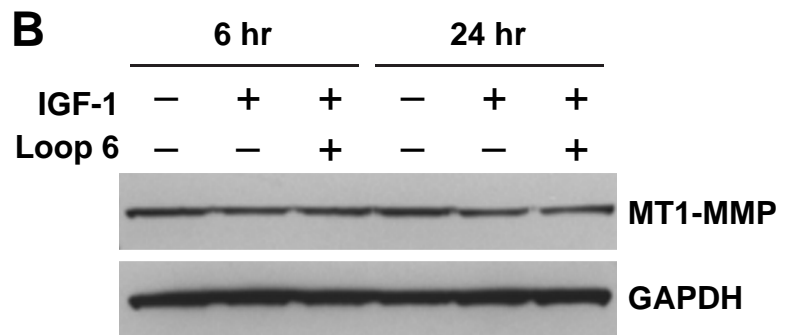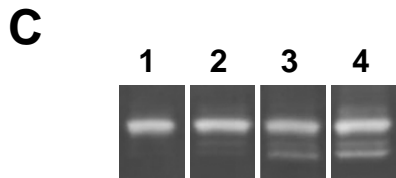

The background of the cover is a high-magnification fluorescence micrograph of endothelial cells. The cells are stained with a red dye, likely rhodamine, which highlights their elongated, spindle-shaped morphology and the complex network of filopodia extending from their surfaces. The overall color palette is a range of reds, from deep maroon to bright, glowing orange-red, creating a textured and dynamic visual field.

*the journal of biological chemistry*

*JBC*

**TIMP-2 Binding to Endothelial Cells: Seeing is Believing**
